# Supplementary material
Source: publisher site journal article supplement (https://www.spandidos-publications.com/1105/downloadSupplementary)
Supplement: Supplementary file 1 [file downloadSupplementary]

## Sheet: Sheet1
Table SII. Summary of RNA-sequencing reads used in analysis.
SampleID	Raw	Clean	Q20	Total mapped	Total Uniquely mapped	Splice reads	Nonsplice reads
shFLNB_1st	82771450	79160344	0.9626	53654210(70.54%)	48121498(89.69%)	23320254(48.46%)	24801244(51.54%)
shFLNB_2nd	90401294	86685551	0.9632	57882880(69.3%)	49913965(86.23%)	24963074(50.01%)	24950891(49.99%)
shCtrl_1st	78275660	74674526	0.9639	47712595(66.47%)	40151933(84.15%)	21377967(53.24%)	18773966(46.76%)
shCtrl_2nd	73046646	69843416	0.9652	47764619(71.07%)	40428882(84.64%)	21829234(53.99%)	18599648(46.01%)
